# Supplementary material for: Accuracy of Double Bark Thickness Estimation Methods Used in Spruce—(Picea abies L. Karst) Timber Production in Czechia
Source: MDPI journal article supplement (doi:10.3390/f14051026), 2023-05-16
Supplement: s1 [file s1]

Archive with 1 entries (1 files):
- forests-2358462-supplementary.pdf
