# Supplementary figures and images for: Accuracy of Double Bark Thickness Estimation Methods Used in Spruce—(Picea abies L. Karst) Timber Production in Czechia
Source: MDPI journal article supplement (doi:10.3390/f14051026), 2023-05-16

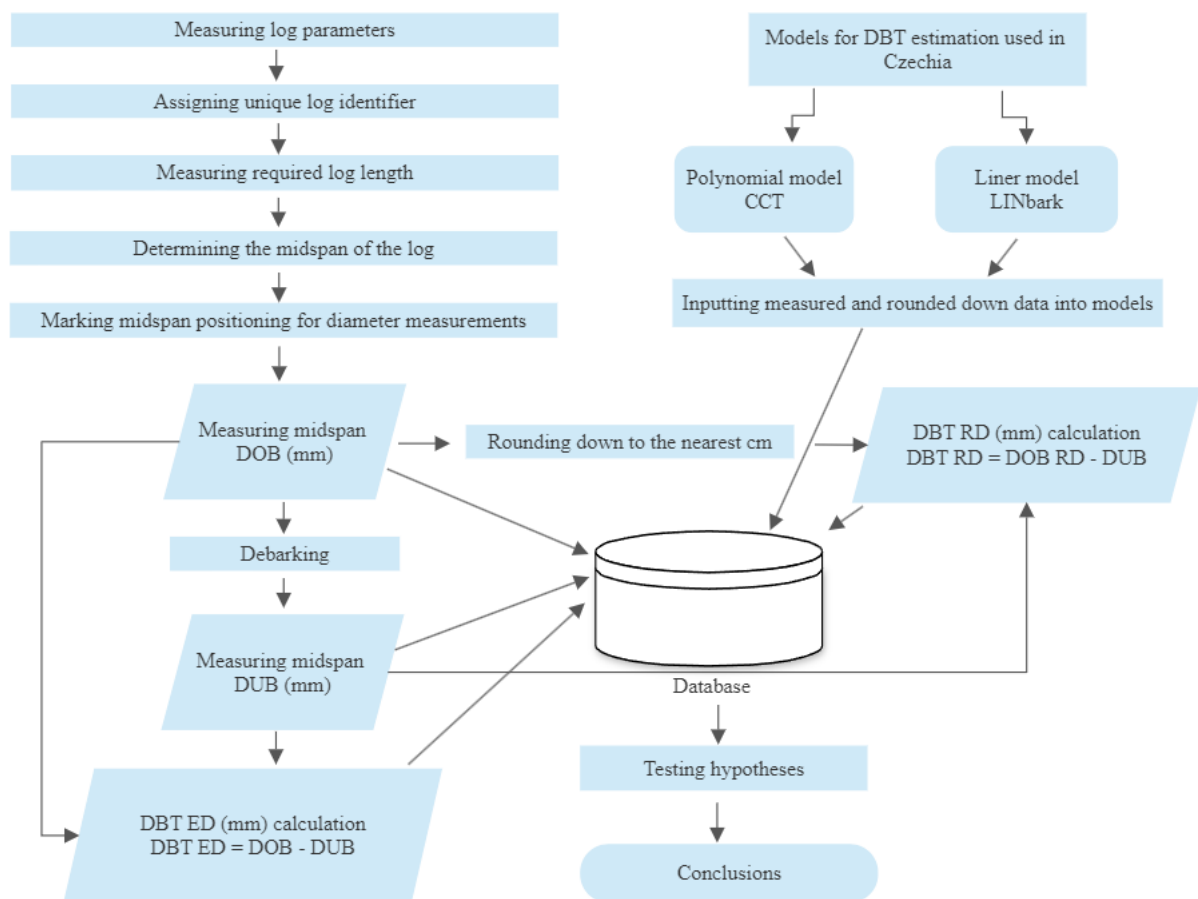

Figure S1: Technical flowchart of the study method

Supplement: s1 [file s1 › forests-2358462-supplementary.pdf]
